# Supplementary material for: Exosome-Based Delivery of Super-Repressor IκBα Alleviates Alcohol-Associated Liver Injury in Mice
Source: MDPI journal article supplement (doi:10.3390/pharmaceutics15020636), 2023-02-14
Supplement: s1 [file s1]

## 1. SUPPLEMENTARY FIGURES

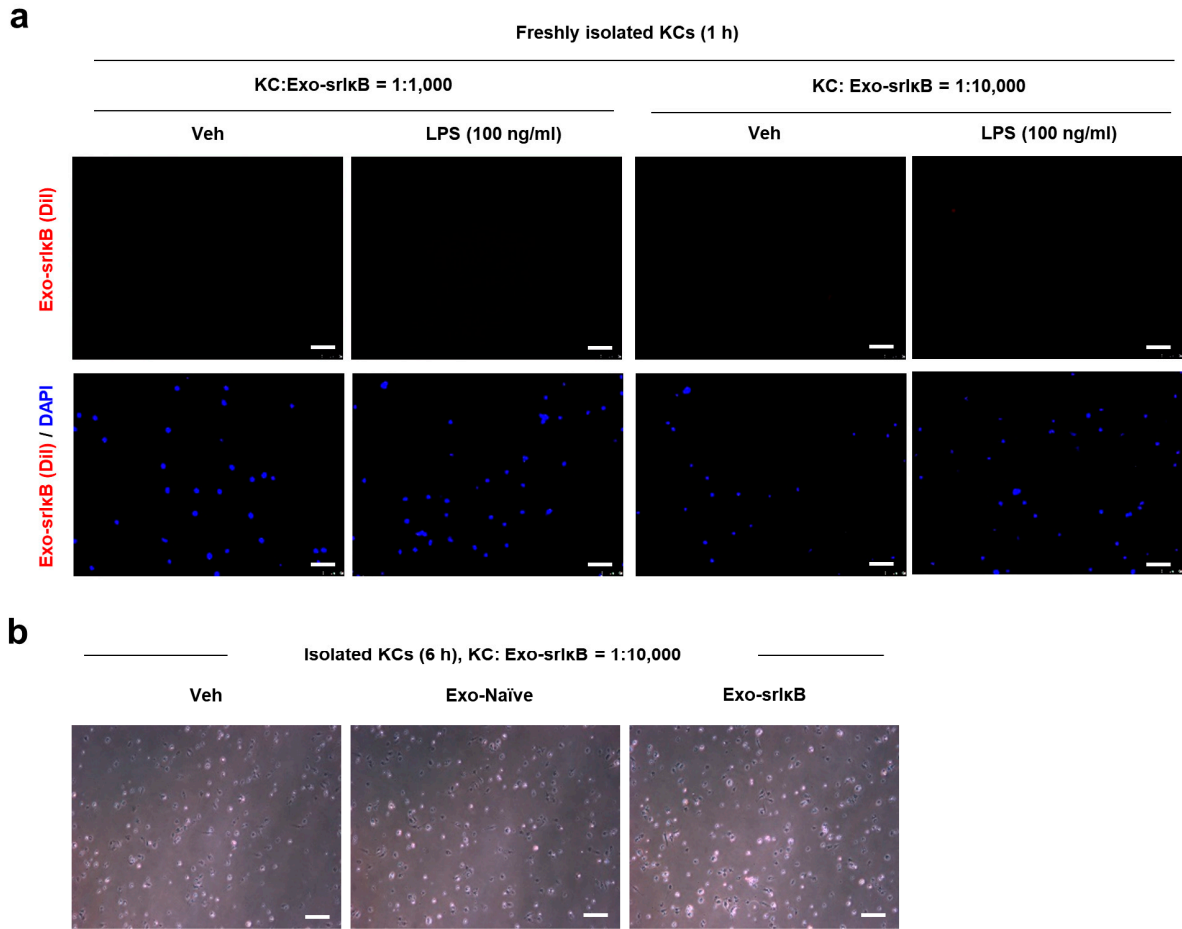

**Figure S1. Exo-Naïve or Exo-srIkB treatment does not induce cell death of primary mouse Kupffer cells.** (a) Representative pictures for culture plates after indicated doses of DiI-labeled Exo-srIkB treatment to primary mouse KCs with vehicle (saline, VEH) or LPS (100 ng ml<sup>-1</sup>) for 1 h ( $n = 5$ /group). (b) Representative pictures for culture plates after KC:exosomes = 1:10,000 doses of Exo-Naïve or Exo-srIkB treatment to primary mouse KCs with vehicle (saline, VEH) for 6 h (triplicated). Scale bars, 50  $\mu$ m.

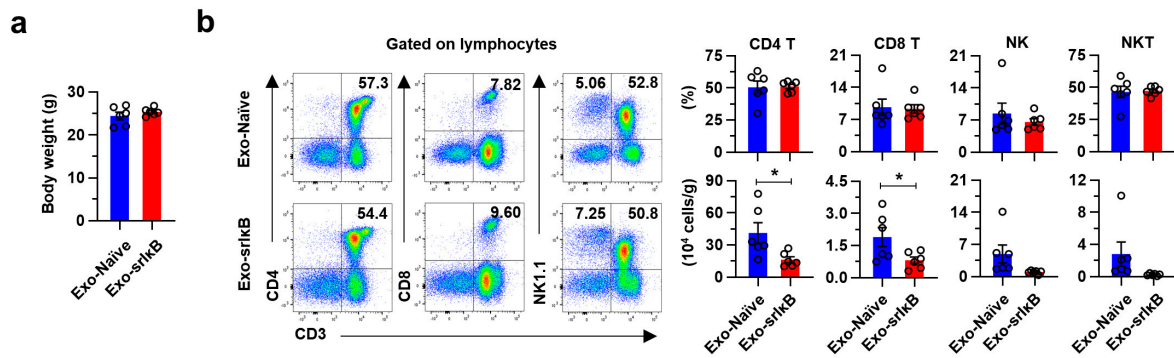

**Figure S2. A single administration of Exo-srIkB does not alter the body weight and hepatic frequencies of lymphocytes in mice with ALD.** (a,b) WT male mice were fed EtOH for 10 days and randomly divided into Exo-Naïve or Exo-srIkB groups ( $n = 6/\text{group}$ ). A single dose ( $5.0 \times 10^{10}$  particles per mouse) of exosomes were intravenously injected. After 1 h, mice were given acute EtOH binge drinking ( $4 \text{ g kg}^{-1}$  of 40% EtOH gavage) and sacrificed after 6 h. (a) Body weight was measured at sacrifice. (b) Flow cytometry analyses of hepatic lymphocytes with representative panels and bar graphs indicating frequencies (upper) or absolute number per gram of liver tissues (lower) of lymphocytes. Data are presented as mean  $\pm$  SEM. \* $P < 0.05$ . Data were analyzed by a two-tailed Student's  $t$ -test.

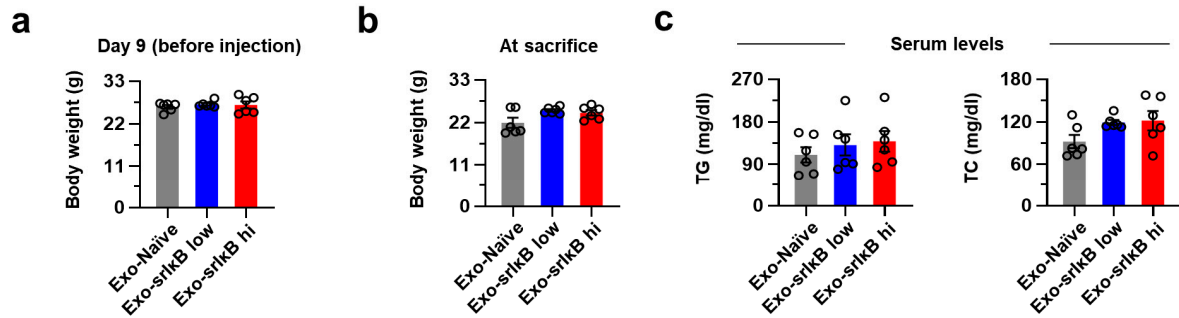

**Figure S3. Three consecutive days of Exo-srIkB injection does not affect body weight and serum TG and TC levels in mice with ALD.** (a-c) WT male mice were fed EtOH for 9 days and randomly divided into Exo-Naïve ( $10^9$  particles/day/mouse), low-dose of Exo-srIkB ( $10^8$  particles/day/mouse), or high-dose of Exo-srIkB ( $10^9$  particles/day/mouse) groups ( $n = 6$ /group). An indicated dose of exosomes was intravenously injected every 24 h for consecutive three days. After 6 h of the last injection, mice were given acute EtOH binge drinking ( $4 \text{ g kg}^{-1}$  of 40% EtOH gavage) and sacrificed after 6 h. (a,b) Body weight was measured on day 9 (a) or at sacrifice (b). (c) Serum TG and TC levels were measured. Data are presented as mean  $\pm$  SEM. Data were analyzed by a One-way ANOVA with Tukey's multiple comparisons test.

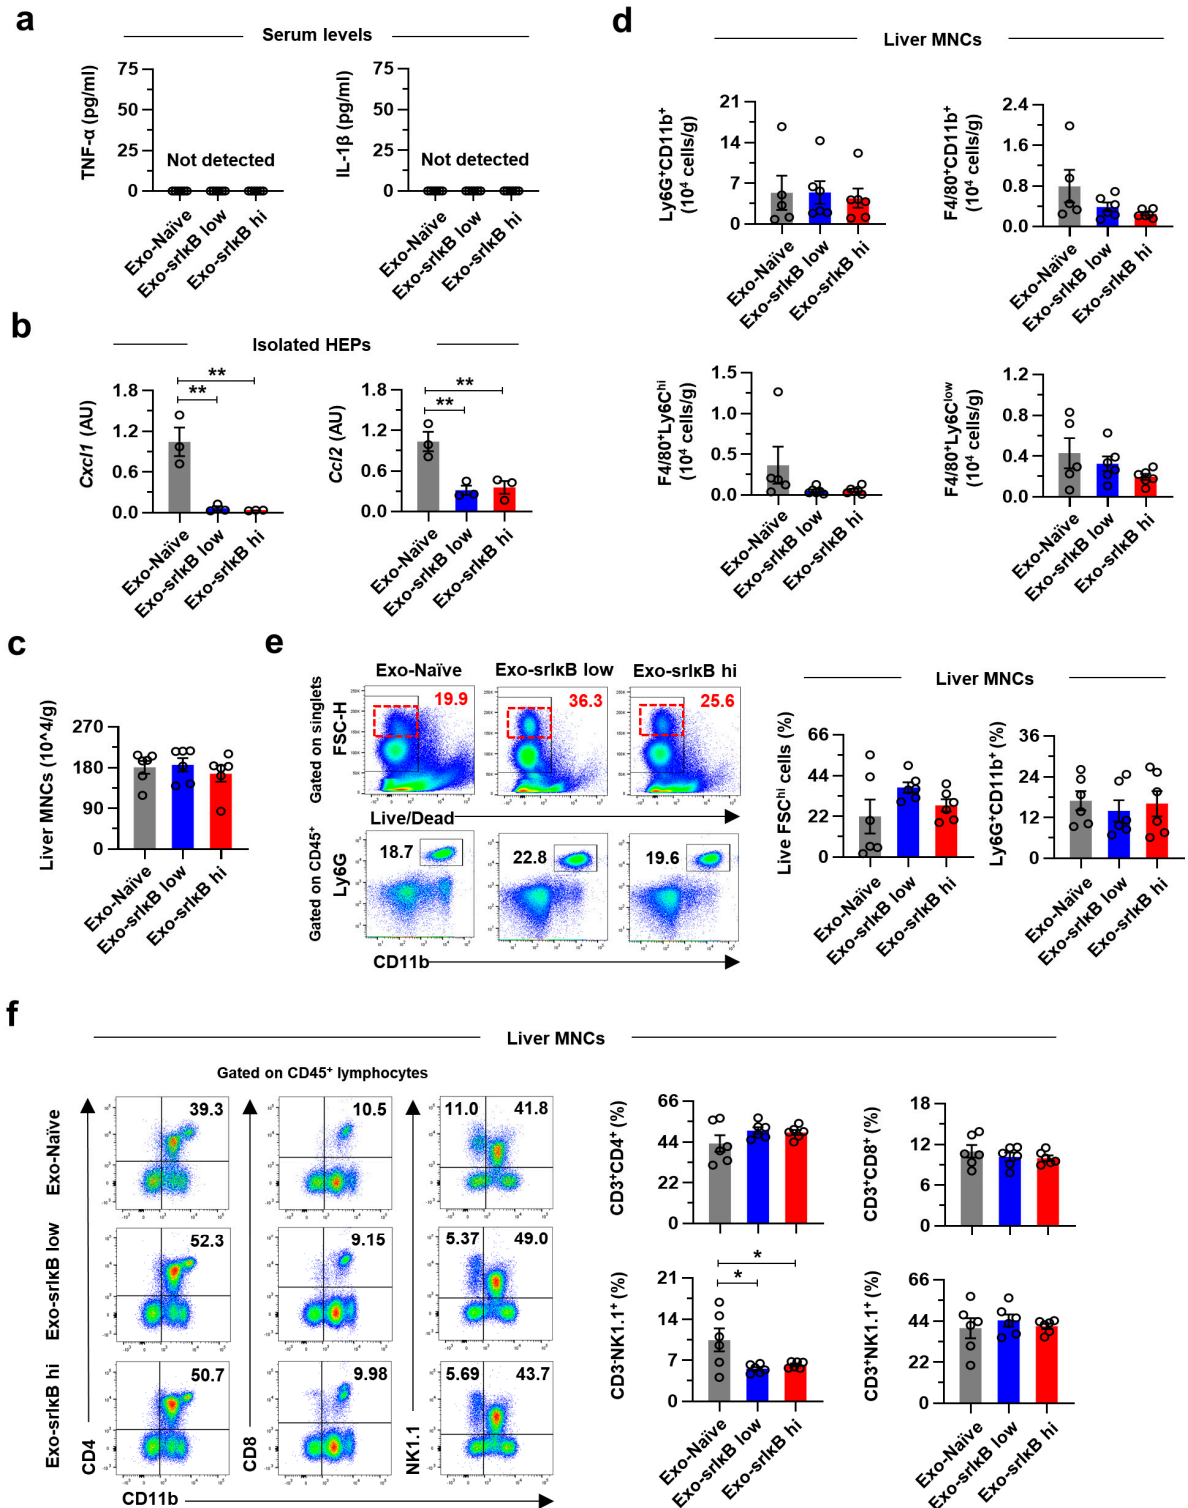

**Figure S4. Three consecutive days of Exo-srIkB injection tends to reduce the hepatic infiltration of immune cells in mice with ALD.** (a-f) WT male mice were fed EtOH for 9 days and randomly divided into Exo-Naive ( $10^9$  particles/day/mouse), low-dose of Exo-srIkB ( $10^8$  particles/day/mouse), or high-dose of Exo-srIkB ( $10^9$  particles/day/mouse) groups ( $n = 6/\text{group}$ ). An indicated dose of exosomes was intravenously injected every 24 h for consecutive

three days. After 6 h of the last injection, mice were given acute EtOH binge drinking (4 g kg<sup>-1</sup> of 40% EtOH gavage) and sacrificed after 6 h. (a) Serum TNF- $\alpha$  and IL-1 $\beta$  levels were measured. (b) qRT-PCR analyses of isolated HEPs ( $n = 3/\text{group}$ ). (c) MNC cell counts per gram of liver tissues. (d-f) Flow cytometry analyses. (d) The absolute number of indicated populations per gram of liver tissues. (e) Hepatic frequencies of live FSC<sup>hi</sup> cells and Ly6G<sup>+</sup>CD11b<sup>+</sup> neutrophils with representative panels and bar graphs. (f) Hepatic frequencies of lymphocytes with representative panels and bar graphs. Data are presented as mean  $\pm$  SEM. \* $P < 0.05$ , \*\* $P < 0.01$ . Data were analyzed by a One-way ANOVA with Tukey's multiple comparisons test.

## 2. SUPPLEMENTARY TABLE

**Table S1. Primer sequences for qPCR.**

| <b>Genes</b>  | <b>Forward</b>                 | <b>Reverse</b>                 |
|---------------|--------------------------------|--------------------------------|
| <i>18s</i>    | ACA GGA TTG ACA GAT TGA TAG C  | GCC AGA GTC TCG TTC GTT A      |
| <i>Acta2</i>  | GTC CCA GAC ATC AGG GAG TAA    | TCG GAT ACT TCA GCG TCA GGA    |
| <i>Ccl2</i>   | TTA AAA ACC TGG ATC GGA ACC AA | GCA TTA GCT TCA GAT TTA CGG GT |
| <i>Colla1</i> | GCT CCT CTT AGG GGC CAC T      | CCA CGT CTC ACC ATT GGG G      |
| <i>Cxcl1</i>  | CTG GGA TTC ACC TCA AGA ACA TC | CAG GGT CAA GGC AAG CCT C      |
| <i>Il1b</i>   | GCC CAT CCT CTG TGA CTC AT     | AGG CCA CAG GTA TTT TGT CG     |
| <i>Il6</i>    | TAG TCC TTC CTA CCC CAA TTT CC | TTG GTC CTT AGC CAC TCC TTC    |
| <i>Tagln</i>  | CAA CAA GGG TCC ATC CTA CGG    | ATC TGG GCG GCC TAC ATC A      |
| <i>Tnf</i>    | AAG CCT GTA GCC CAC GTC GTA    | AAG GTA CAA CCC ATC GGC TGG    |
